# Supplementary material
Source: ML conference proceedings conference paper supplement (https://openaccess.thecvf.com/content/CVPR2026/html/Sargood_GenTract_Generative_Global_CVPR_2026_paper.html)
Supplement: Supplementary file 1 [file Sargood_GenTract_Generative_Global_CVPR_2026_supplemental.pdf]

# GenTract: Generative Global Tractography

## Supplementary Material

### A. Statistical Analysis

Significance ( $p < 0.01$ ) was determined using paired t-tests with one-sided bootstrapping on the test set.

**Architecture (Table 1)** Diffusion models significantly outperformed FM models at each architectural size ( $M = 4, 6, 8$ ). Furthermore, the Diffusion model with  $M = 8$  and dimension  $n = 256$  yielded statistically superior results compared to all other tested architecture depths ( $M = 4, 6$ ) and widths ( $n = 128, 512$ ).

**Benchmarking (Tables 2–5)** GenTract demonstrated statistically significant improvements over the second-best performing methods (TractOracle or DDTracking) in both BS % P and TO-Net % P across all experiments.

### B. Further GenTract Implementation Details

**Input representation and preprocessing.** Following standard practice [18, 35], we use an SH order of  $L_{\max} = 6$ , resulting in  $m = 28$  SH coefficients. All streamlines are resampled to 128 points as in previous work [35]. Each of the 28 SH 3D coefficient volumes is padded to shape  $(H, W, D) = (88, 112, 88)$ .

**Latent spaces and architecture.** We use latent dimension values of  $(C_z, H_z, W_z, D_z) = (4, 22, 28, 22)$  for the initial VAEs, and  $(C_c, H_c, W_c, D_c) = (32, 11, 14, 11)$  for the class-conditioned encoder  $\mathcal{E}^c$ . Within  $\mathcal{E}^c$ , coefficient-index conditioning ( $i \in [0, m - 1]$ ) is implemented via a learned embedding injected into the residual down-sampling blocks using the same additive mechanism commonly used for diffusion timestep embeddings. In the Transformer backbone, 8 attention heads are used for both self- and cross-attention.

**Training setup and computational cost.** All GenTract models are trained with a batch size of 1024 streamlines for 100 epochs. We use an initial learning rate of  $5 \times 10^{-5}$  with cosine annealing over the full training cycle to a final learning rate of  $1.25 \times 10^{-5}$ . Training proceeds in two stages: representation learning, where each of the  $m$  independent VAEs (one per SH coefficient) requires approximately 48 GPU-hours, and generative modeling, where the conditional Transformer requires 168–336 GPU-hours depending on the architecture.

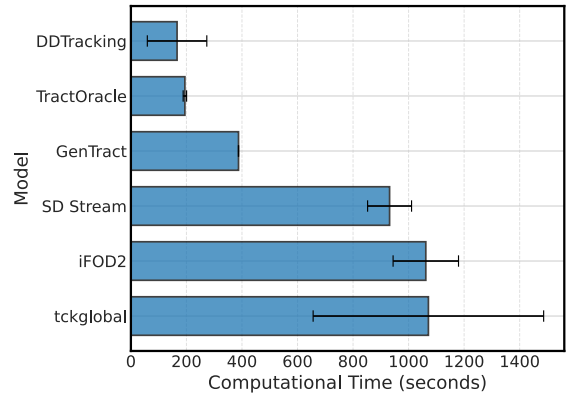

Figure 5. Computational time comparison for all methods. Bars show inference time (seconds) (mean  $\pm$  std). The std for GenTract is very small.

### C. Baseline Implementation Details

For each of the DL-based methods (TractOracle, DDTracking), we use the standard inference pipelines from their open source implementations. Specifically, we run TractOracle inference with parameters: noise level: 0.1, seeds per voxel: 10, number of actors: 2500, and DDTracking with parameters: step size: 1, max angle: 45, max streamline length: 200, min streamline length: 40. Seeding masks are generated by dilating Fractional Anisotropy (FA) masks at  $FA > 0.2$  to approximate a white matter mask, which is then dilated (and subtracted) to form a White Matter / Gray Matter interface mask, as done in [35]. For the classic non-DL methods (iFOD2, SD Stream, tckglobal), we use recommended practices for their inference [37]. Specifically, iFOD2 and SD Stream are used to generate  $5 \times 10^6$  streamlines before undergoing SIFT filtering to  $500 \times 10^3$  streamlines, with seeding masks generated from 5ttgen [31]. tckgen is used with number of iterations:  $1 \times 10^9$ .

### D. Qualitative Results

In Figure 6 we provide additional qualitative results to show generated tractograms (with 5,000 sampled streamlines) from GenTract, along with other baseline methods. We also show two different segmented bundles: the Corpus Callosum Occipital (CC\_Oc) in Figure 7, and the Left Pyramid Tract (PYT\_L) in Figure 8, generated by GenTract across different subjects, showing subject-specific geometries. Additionally, we compare bundle-specific results across baseline methods to further assess sensitivity of these methods to noisy and low-resolution conditions (Figure 9).

In this figure, we present a failure mode of GenTract. We see that GenTract shows enhanced bundle attenuation under low-resolution and noisy conditions compared with baseline methods for the PYT\_L bundle, but similar to the other baseline methods, it is unable to resolve the CC\_Oc bundle.

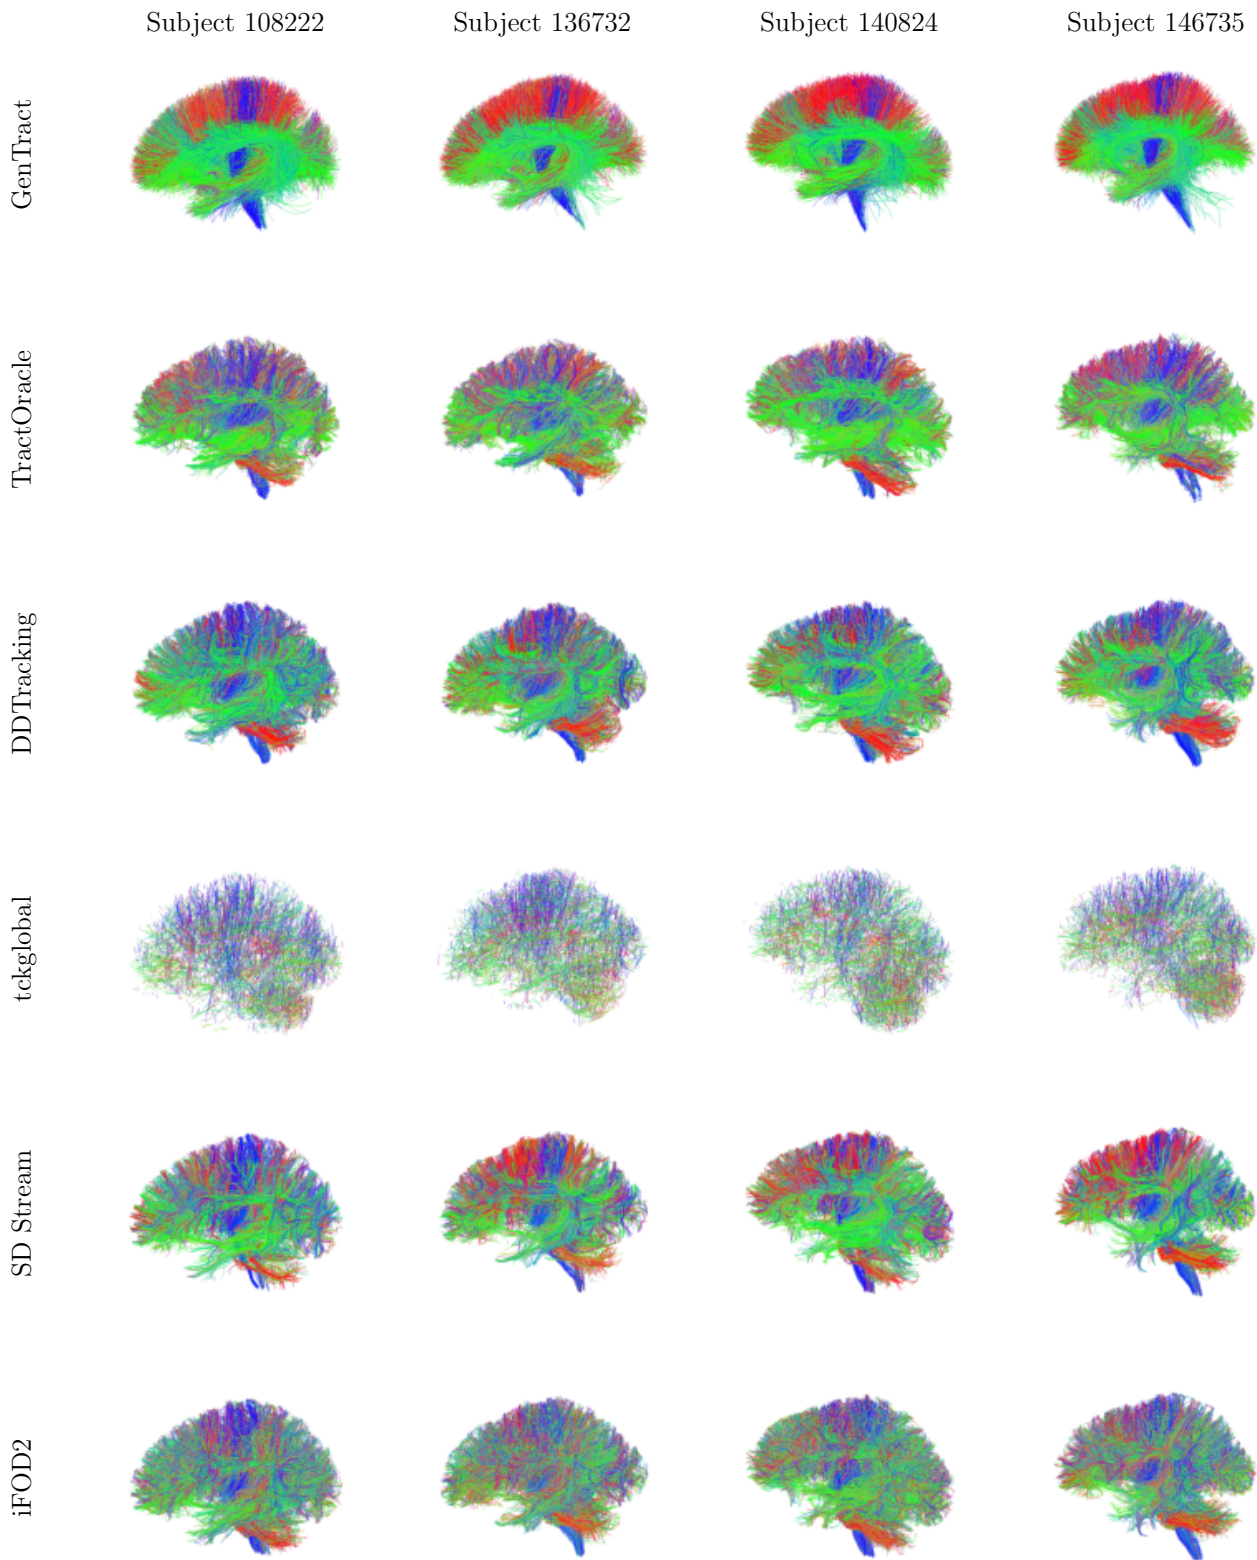

Figure 6. Qualitative result showing generated tractograms for 4 HCP test subjects for all methods on original (uncorrupted) data.

CC\_Oc

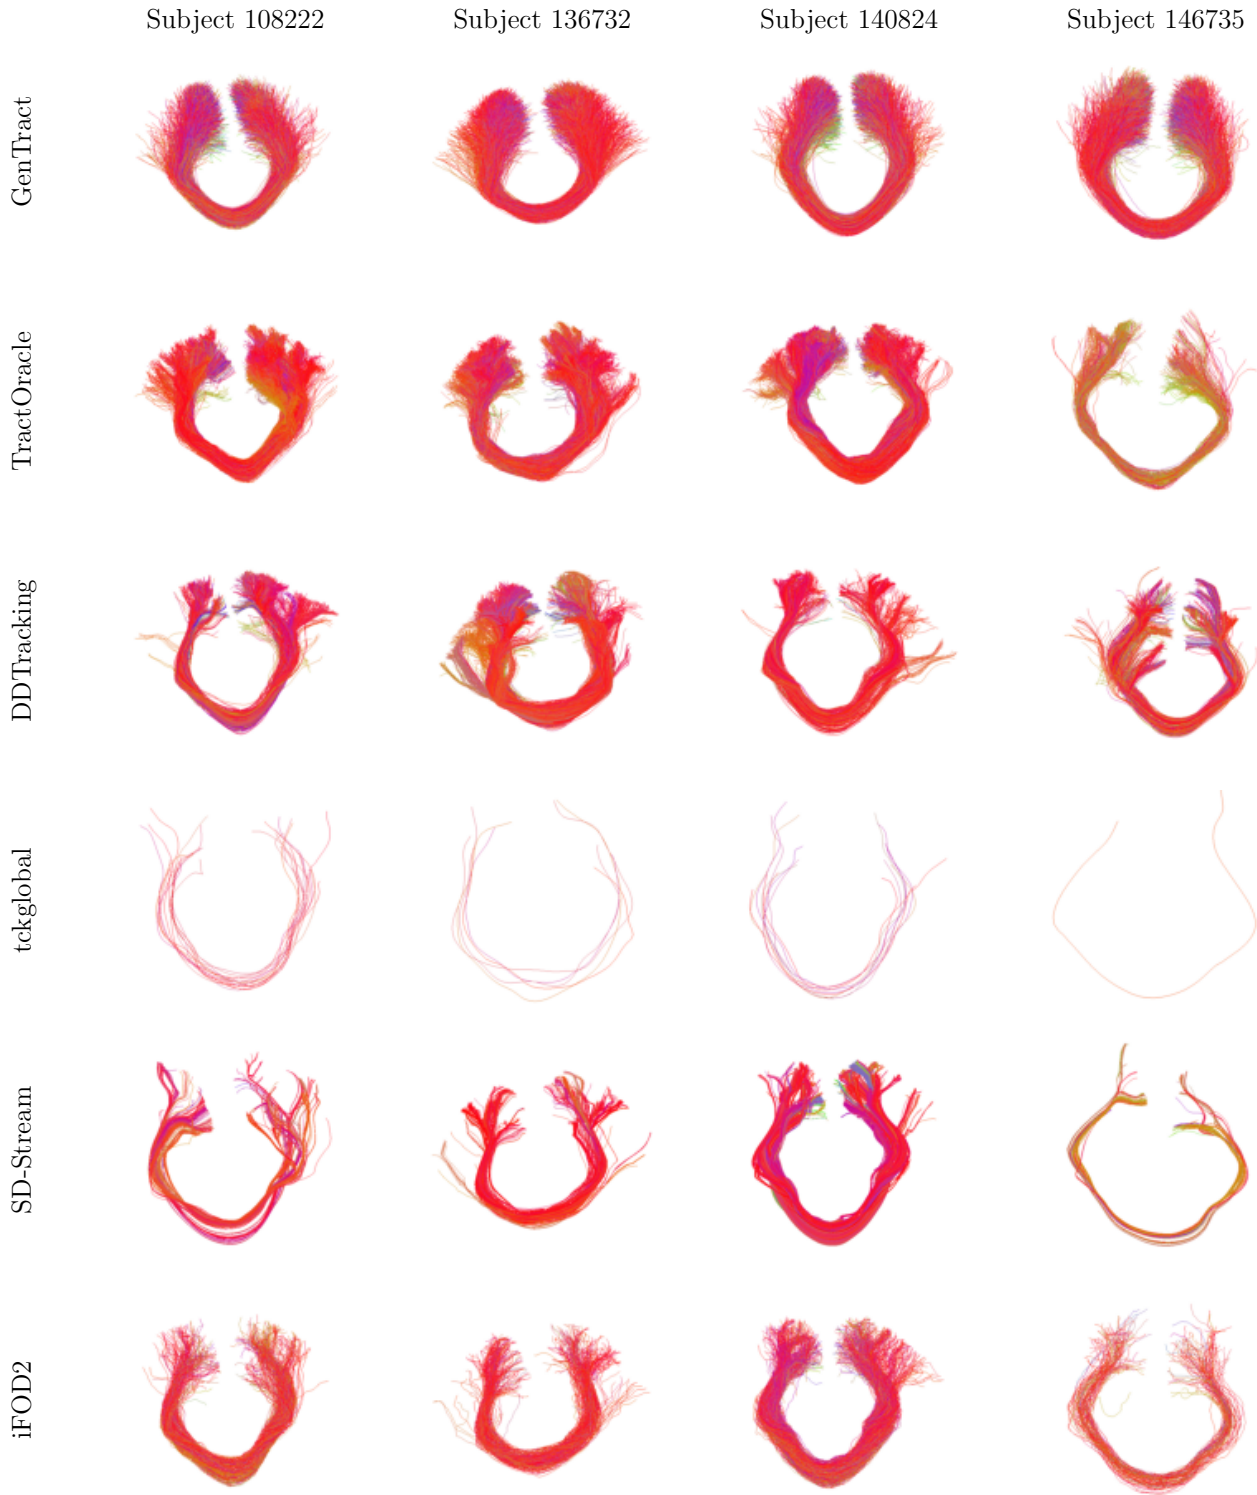

Figure 7. Qualitative result showing generated and segmented CC\_Oc bundles for 4 HCP test subjects for all methods on original (uncorrupted) data.

# PYT\_L

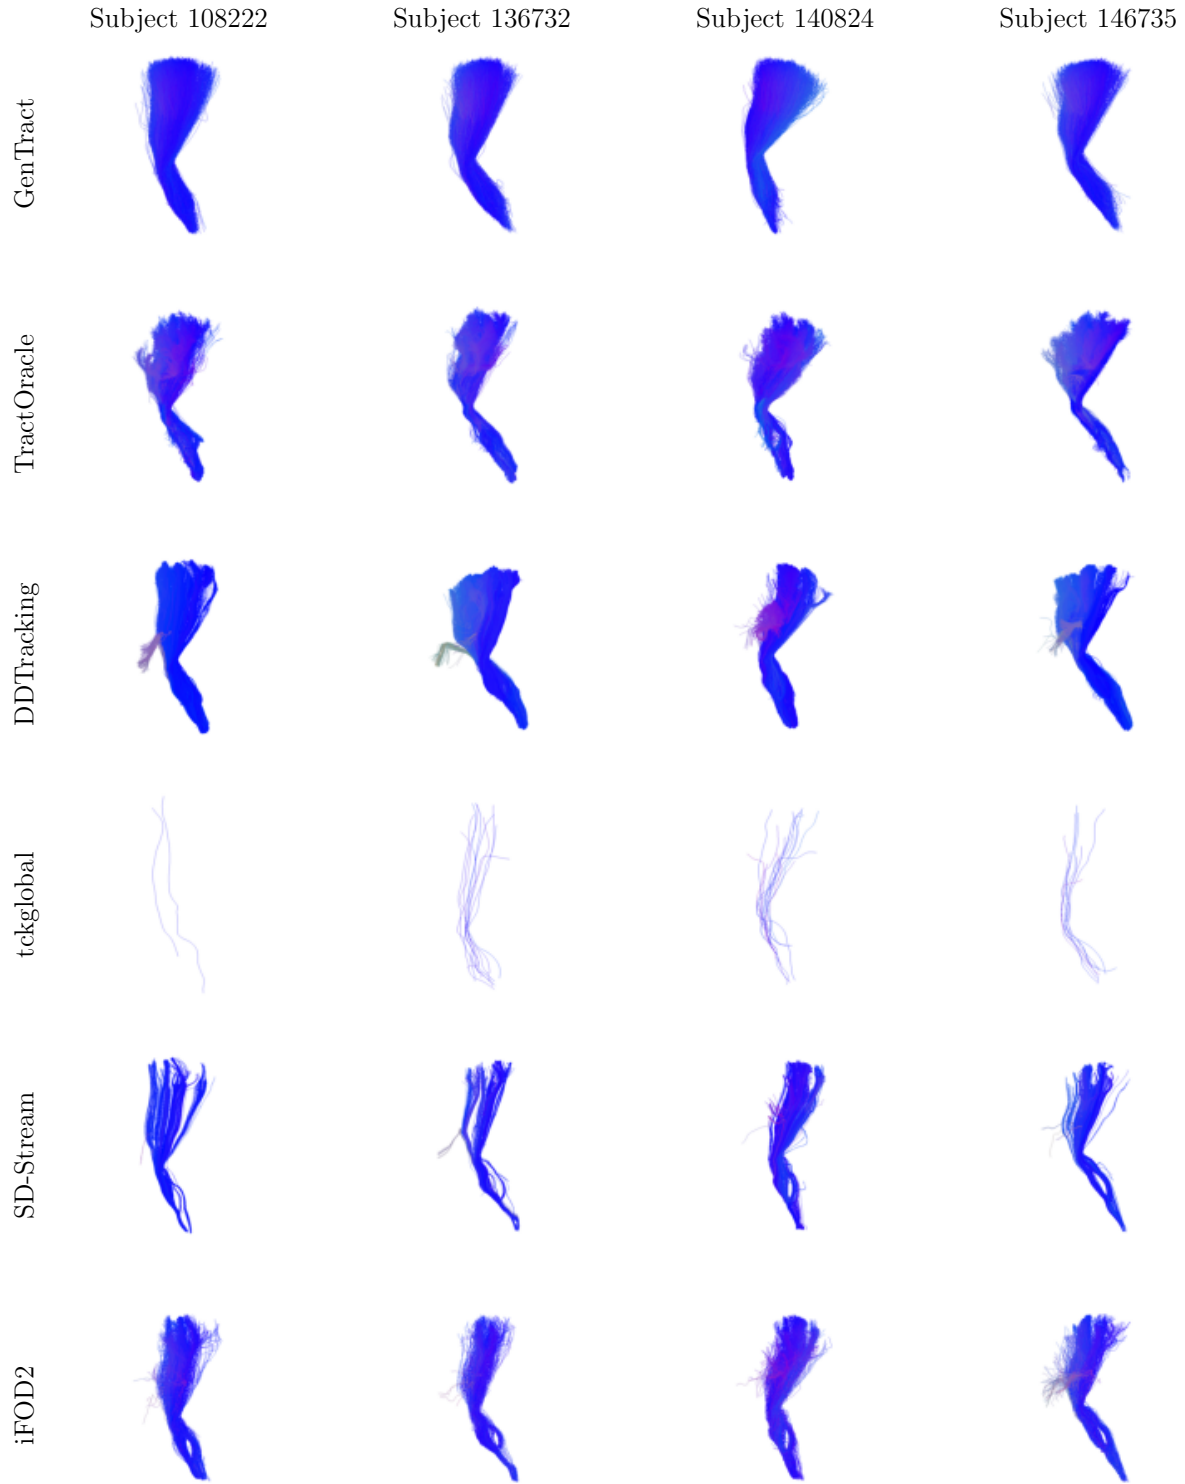

Figure 8. Qualitative result showing generated and segmented PYT\_L bundles for 4 HCP test subjects for all methods on original (uncorrupted) data.

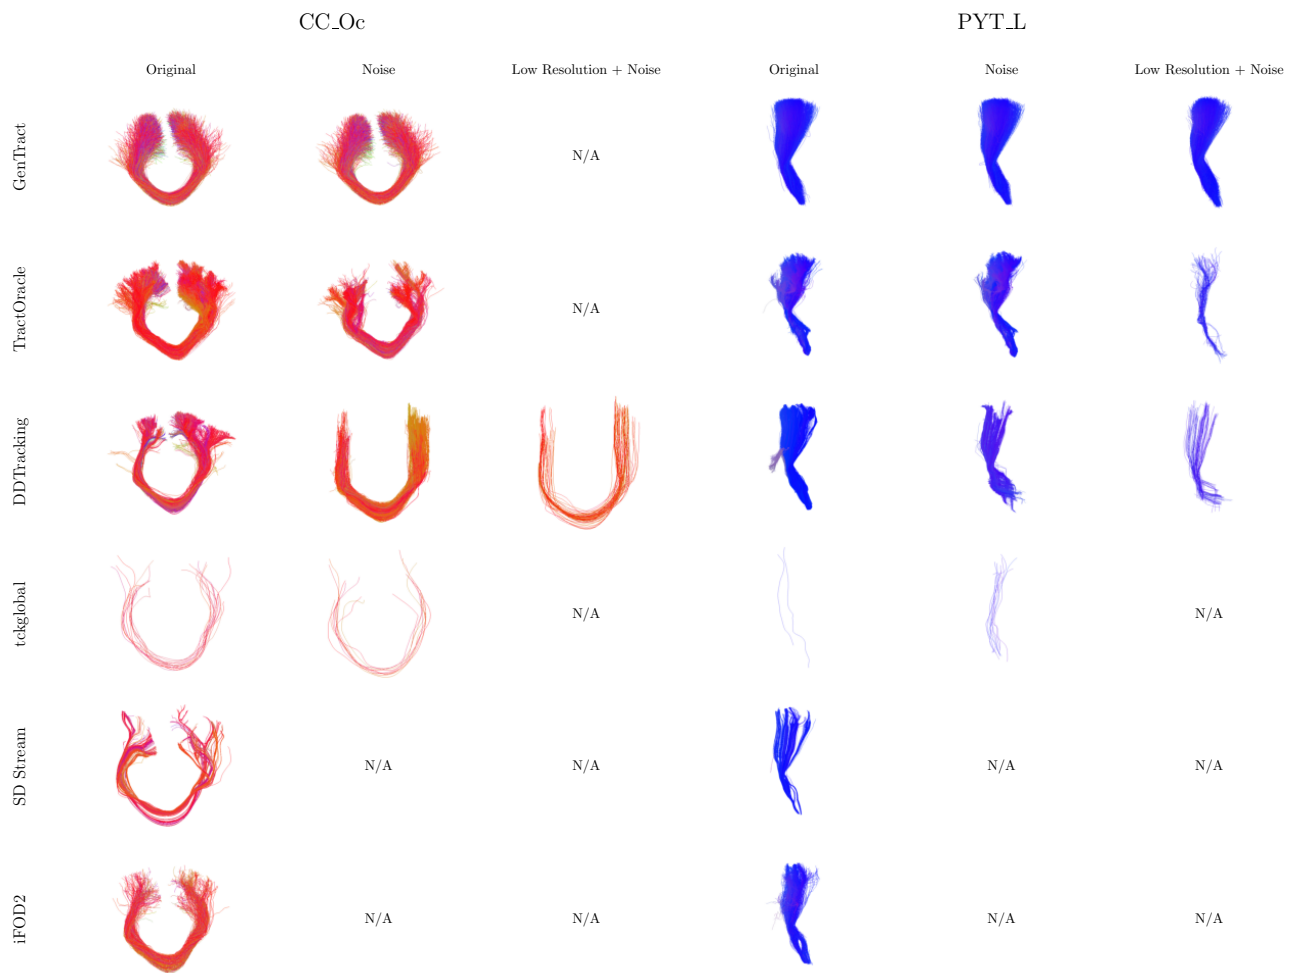

Figure 9. Qualitative result showing generated and segmented CC\_Oc and PYT\_L bundles for a single HCP test subject (108222) for all methods on original, noisy, and low-resolution and noise settings.
